# Supplementary material for: Structure and Function of the ABCD1 Variant Database: 20 Years, 940 Pathogenic Variants, and 3400 Cases of Adrenoleukodystrophy
Source: MDPI journal article supplement (doi:10.3390/cells11020283), 2022-01-14
Supplement: s1 [file s1]

**Supplemental Figure S1 to Structure and function of the ABCD1 variant database: 20 years, 940 pathogenic variants and 3400 cases of adrenoleukodystrophy**

**CLUSTAL Omega (1.2.4) multiple sequence alignment of ABCD1 proteins from 54 different species**

|                    |                                                                |     |
|--------------------|----------------------------------------------------------------|-----|
| Human              | mpvlsrprpwrngntlkrtavllalaaygahkvypvlvrqclaparglqapageptqeasgv | 60  |
| Chimpanzee         | mpvlsrprpwrngntlkrtavllalaaygahkvypvlvrqclaparglqapageptqeasgv | 60  |
| Elephant           | mpvlstprpsrvttlkrtavvlaltaygahkiyplvrqclgpargpqgpagepageasga   | 60  |
| Gorilla            | mpvlsrprpwrngntlkrtavllalaaygahkvypvlvrqclaparglqapageptqeasgv | 60  |
| Green-Monkey       | -mpvprprpwrngstlkrtavllalaaygahkvypvlvrqclapargsqapakestqeasg- | 58  |
| Jerboa             | mpvlstprssrvttlkrtavvlaltaygvhkiyplvrqcltpargqpvpapeptqeapga   | 60  |
| Macaque            | mpvlsrprpwrngstlkrtavllalaaygvhkvypvlvrqclapvrgsqapareptqessga | 60  |
| Marmoset           | mpvlsmprpwrngstlkrtavllalaaygahkayplvrqclavargqpqapardptqeasga | 60  |
| Mouse              | mpvlstprpsrvttlkrtavvlaltaygvhkiyplvrqcltpargqpvpapeptqeasga   | 60  |
| Orangutan          | mpvlsrprpwrngstlkrtavllalaaygahkvypvlvrqclasargqpapageptqeasgv | 60  |
| Panda              | mpvlstprssrvttlkrtalvltaltaygahkiyplvrqylaatrpgqpvpapeptqeisga | 60  |
| Pig                | mtvlstprpsrvttlkrtavvlaltaygahkiyplvrqclapargqpqgprelatqevpga  | 60  |
| Pika               | mpvlsttrpsrattlkrtavimalaaygahklyplvrqclglargqpvpgrgeptqeapgs  | 60  |
| Prairie-deer-mouse | mpvlstprssrvttlkrtavvlaltaygvhkiyplvrqcltpargqpvtgempqetsga    | 60  |
| Rabbit             | mpvlstarpssrvttlkrtavvvaltaygvhkiyplvrqclapargqpvpgrgeptqeasga | 60  |
| Rat                | mpvlstprpsrvttlkrtavvlaltaygvhkiyplvrqcltpargqpvpapeptqeasga   | 60  |
| Rhesus-Monkey      | mpvlsrprpwrngstlkrtavllalaaygvhkvypvlvrqclapargsqapareptqessga | 60  |
| Seal               | mpvlstsrssrvttlkrtalvltaltaygahkiyplvrqylaatrpgqpvpapeptqeasga | 60  |
| Squirrel-Monkey    | mpvlstprpwrngstlkrtavllalaaygahkayplvrqclalargqpqaptrdptqeasga | 60  |
| Tarsier            | mpvlstprpsrvttlkrtavvlalaaygvhkiyplvrqclapargqpqglareptqeapga  | 60  |
| Tasmanian-devil    | -----                                                          | 0   |
| Walrus             | mpvlstprssrvttlkrtalvltaltaygahkiyplvrqylaatrpgqpvpapeptqeasga | 60  |
| Water-buffalo      | -----                                                          | 0   |
| White-Rhinoceros   | mpvlsiprpsrvttlkrtavllaltaygahkiyplvrqclvpargqpvpapeptqetsga   | 60  |
| Yak                | mtvlstprasrvttlkrtavvlaltaygahklyplvrqclapargqpqapave-----     | 52  |
| Aardvark           | mpvlstprpsrvttlkrtavvlaltaygahklyplvrqclapargtlgvpvgqlqea---   | 57  |
| Alpaca             | mtvlstyrpsrvttlkrtavvlaltaygahkvypvlvrqclalarspqsagesaqevsga   | 60  |
| Armadillo          | mpvlstprssrvttlkrtavvlaltaygahkiyplvrqclvparspqqgsrepaqdaaga   | 60  |
| Baboon             | mpvlsrprpwrngstlkrtavllalaaygvhkvypvlvrqclapargsqapareptqeasga | 60  |
| Bat                | mpvlstprssrvttlkrtavvlaltaygahkiyplvrqclapargqpvpapeptqeasgt   | 60  |
| Cat                | mpvlstprpsrvttlkrtalvltaltaygahkiyplvrqylaasrgqpvpapeptqdvsga  | 60  |
| Chinchilla         | mpvlstprpsrvttlkrtavvlaltaygahklyplvrqclapargqpqgpageptqealgs  | 60  |
| Chinese-hamster    | mpvlstprssrvttlkrtavvlaltaygvhkiyplvrqcltpargqpvpapeptqetsgv   | 60  |
| Cow                | mtvlstprasrvttlkrtavvlaltaygahklyplvrqclapargqpqapaveptpdvsga  | 60  |
| Dog                | mpvlstprssrvttlkrtalvltaltaygahkiyplvrhylaatrpgqpvpapeptqeasga | 60  |
| Dolphin            | -----                                                          | 0   |
| Ferret             | mpvlstprssrvttlkrtalvltaltaygahkvypllrqylaatrpgqpvpapeptqeasga | 60  |
| Florida-manatee    | msvlstprpsrvttlkrtavvlaltaygahkiyplvrqclapargqpvpapeptqeasga   | 60  |
| Flying-Fox         | mpvlstprlsrvttlkrtavvlaltaygahkiypllrqclaparapqlpageptqeasga   | 60  |
| Golden-hamster     | mpvlstprssrvttlkrtavvlaltaygvhkiyplvrqcltpargqpvpapeptqeasgv   | 58  |
| Ground-Squirrel    | mpvlstprpsrvttlkrtavvlaltaygvhkiyplvrqclarsrgqpvpapeptqealea   | 60  |
| Guinea-pig         | mpvlstprpsrvttlkrtavvlaltaygahklyplvrqclapargqpqgpageptqealgp  | 60  |
| Hedgehog           | mpvlstpkpsrattlkrtavvlalaaygahklyplarqclalalarappgpapdpqeal-t  | 59  |
| Horse              | mpvlstpqpsrvttlkrtavvlaltaygahkiyplvrqclapargqpvpapeptqeasga   | 60  |
| Lemur              | mpvlstprpsrvttlkrtavalaitygvhkiyplvrqclapargqpvpapeptqetsga    | 60  |
| Minke-whale        | -----vltaltaygahkiyplvrqclapargqpvtpagespqaasga                | 40  |
| Mole-rat           | mpvlstprssrvttlkrtavvlaltayglqkiyplvrqcltpargqpvpapeptqqaasga  | 60  |
| Naked-mole-rat     | mpvlstprpsrvttlkrtavvlaltaygahklyplvrqcltpargqpvpapeptqqaasga  | 60  |
| Opposum            | -----                                                          | 0   |
| Orca               | mtvlstprpsrvttlkrtavvlaltaygahkiyplvrqclapargqpvtpagesaqeasga  | 60  |
| Prairie-vole       | mpvlstprssrvttlkrtavvlaltaygvhkiyplvrqcltpargqpvpapeptqeasga   | 60  |
| Python             | -----a                                                         | 1   |
| Small-eared-galago | mpvlstprssrvttlkrtavvlaltaygvhkiyplvrqclaparvtqgptreptqeasgs   | 60  |
| Sperm-whale        | mtvlstprpsrvttlkrtavvlaltaygahkiyplvrqclapargqpvtpagesaqeasga  | 60  |
|                    |                                                                |     |
| Human              | aaakagmnrvflqrlwlrlrlfprvlcretgllalhhsaalvsrtflsvyvarldgrlar   | 120 |
| Chimpanzee         | aaakagmnrvflqrlwlrlrlfprvlcretgllalhhsaalvsrtflsvyvarldgrlar   | 120 |
| Elephant           | aaakasvnrflqrlwlrlrlfprvlcretgllalhhsaalvsrtflsvyvarldgrlar    | 120 |
| Gorilla            | aaakagmnrvflqrlwlrlrlfprvlcretgllalhhsaalvsrtflsvyvarldgrlar   | 120 |
| Green-Monkey       | --akagmnrvflqrlwlrlrlfprvlcretgllalhhsaalvsrtflsvyvarldgrlar   | 116 |
| Jerboa             | taakagmnrvflqrlwlrlrlfprvlcretgllalhhsaalvsrtflsvyvarldgrlar   | 120 |
| Macaque            | aaakagmnrvflqrlmwlrlrlfprvlcretgllalhhsaalvsrtflsvyvarldgrlar  | 120 |
| Marmoset           | aaaktgmnrvflqrlwlrlrlfprvlcretgllalhhsaalvsrtflsvyvarldgrlar   | 120 |
| Mouse              | tatkagmnrvflqrlalrlrlfprvlcretgllalhhsaalvsrtflsvyvarldgrlar   | 120 |
| Orangutan          | aaakagmnrvflqrlwlrlrlfprvlcretgllalhhsaalvsrtflsvyvarldgrlar   | 120 |
| Panda              | taakasvnrflqrlglrlrlfprtlcretgllalhhsaalvsrtflsvyvarldgrlar    | 120 |
| Pig                | taakagvnrflqrlwlrlrlfprlcretgllalhhsaalvsrtflsvyvarldgrlar     | 120 |
| Pika               | taakagmnrvflqrlwlrlrlfprvlcretgllalhhsaalvsrtflsvyvarldgrlar   | 120 |
| Prairie-deer-mouse | taaragmnrvflqrlwlrlrlfprvlcretgllalhhsaalvsrtflsvyvarldgrlar   | 120 |

|                    |                                                               |     |
|--------------------|---------------------------------------------------------------|-----|
| Rabbit             | taakagmnrvflqrlwlrlrlfprvlcretgllalhhsaalvsrtflsvyvarldgrlar  | 120 |
| Rat                | ttakagmnrvflqrlwlrlrlfpgvlcretgllalhhsaalvsrtflsvyvarldgrlar  | 120 |
| Rhesus-Monkey      | aaakagmnrvflqrlmwlrlrlfprvlcretgllalhhsaalvsrtflsvyvarldgrlar | 120 |
| Seal               | taakagvnrflqrlglrlrlfprtlcretgllalhhsaalvsrtflsvyvarldgrlar   | 120 |
| Squirrel-Monkey    | aaakagmnrvflqrlwlrlrlfprvlcretgllalhhsaalvsrtflsvyvarldgrlar  | 120 |
| Tarsier            | saakagmnrvflqrlwlrlrlfprvlcretgllalhsgalvsrtflsvyvarldgrlar   | 120 |
| Tasmanian-devil    | -----                                                         | 0   |
| Walrus             | taakagvnrflqrlglrlrlfprtlcretgllalhhsaalvsrtflsvyvarldgrlar   | 120 |
| Water-buffalo      | ---kagvnqvlqrlwlrlrlfprilcretgllalhhsaalvsrtflsvyvarldgrlar   | 57  |
| White-Rhinoceros   | -aakagvnrflqrlwlrlrlfprilcretgllalhhsatlvrtflsvyvarldgrlar    | 119 |
| Yak                | -----flqrlwlrlrlfprilcretgllalhhsaalvsrtflsvyvarldgrlar       | 102 |
| Aardvark           | ---kasvnrflqrlwlrlrlfprvlcretgllalhhsaalvsrtflsvyvarldgrlar   | 114 |
| Alpaca             | t--kagvnrflqrlwlrlrlfprilcretgllalhhsaalvsrtflsvyvarldgrlar   | 118 |
| Armadillo          | aaakasvnrflrlllwlrlrlfprvlcretgllalhhsaalvsrtflsvyvarldgrlvr  | 120 |
| Baboon             | aaakagmnrvflqrlwlrlrlfprvlcretgllalhhsaalvsrtflsvyvarldgrlar  | 120 |
| Bat                | tgakagvnrflqrlwlrlrlfprilcretgllalhhsaalvsrtflsvyvarldgrlar   | 120 |
| Cat                | taakasvnrflrlllglrlrlfprtlcretgllalhhsaalvsrtflsvyvarldgrlar  | 120 |
| Chinchilla         | taakagmnrvflrlllwlrlrlfprvlcretgllalhhsaalvsrtflsvyvarldgrlar | 120 |
| Chinese-hamster    | taakagmnrvflqrlwlrlrlfprilcretgllalhhsaalvsrtflsvyvarldgrlar  | 120 |
| Cow                | pagkagvnqvlqrlwlrlrlfprilcretgllalhhsaalvsrtflsvyvarldgrlar   | 120 |
| Dog                | taakasvnrflqrlglrlrlfprtlcretgllalhhsaalvsrtflsvyvarldgrlar   | 120 |
| Dolphin            | -----nrvffqrlwlrlrlfprilcretgllalhhsaalvsrtflsvyvarldgrlar    | 53  |
| Ferret             | taakasvnrflqrlfgllrlrlfprtlcretgllalhhsaalvsrtflsvyvarldgrlar | 120 |
| Florida-manatee    | a-akasvnrflqrlwlrlrlfprvlcretgllalhhsaalvsrtflsvyvarldgrlar   | 119 |
| Flying-Fox         | tatkagvnrflqrlwlrlrlfprilcretgllalhhsaalvsrtflsvyvarldgrlar   | 120 |
| Golden-hamster     | taakagmnrvflqrlwlrlrlfprilcretgllalhhsaalvsrtflsvyvarldgrlar  | 118 |
| Ground-Squirrel    | taakagmnrvflqrlwlrlrlfprvlcretgllalhhsaalvsrtflsvyvarldgrlar  | 120 |
| Guinea-pig         | taakagmnrvflrlllwlrlrlfprvlcretgllalhhsaalvsrtflsvyvarldgrlar | 120 |
| Hedgehog           | taakasvnrflqrlwlrlrlfprilcretgllalhhsaalvsrtflsvyvarldgrlar   | 119 |
| Horse              | taakagvnrflqrlwlrlrlfprilcretgllalhhsaalvsrtflsvyvarldgrlar   | 120 |
| Lemur              | tgakagmnqvlqrlwlrlrlfprvlcretgllalhhsaalvsrtflsvyvarldgrlar   | 120 |
| Minke-whale        | taakagvnrflqrlwlrlrlfprilcretgllalhhsaalvsrtflsvyvarldgrlar   | 100 |
| Mole-rat           | taaktgmnrvflqrlwlrlrlfprvlcretgllalhhsaalvsrtflsvyvarldgrlar  | 120 |
| Naked-mole-rat     | tatkagmnrvflrlllwlrlrlfprvlcretgllalhhsaalvsrtflsvyvarldgrlar | 120 |
| Opposum            | -----llrlfprvlcretgllalhhsaalvsrtflsvyvarldgrlar              | 43  |
| Orca               | taakagvnrflqrlwlrlrlfprilcretgllalhhsaalvsrtflsvyvarldgrlar   | 120 |
| Prairie-vole       | taakagmnrvflqrlwlrlrlfprvlcretgllalhhsaalvsrtflsvyvarldgrlar  | 120 |
| Python             | tasppgvnkvlrlllwlrlrlfprvlcretgllalhhsaalvsrtflsvyvarldgrlar  | 61  |
| Small-eared-galago | tvakagmnrvflqrlwlrlrlfprvlcretgllalhhsaalvsrtflsvyvarldgrlar  | 120 |
| Sperm-whale        | taakagvnrflqrlwlrlrlfprilcretgllalhhsaalvsrtflsvyvarldgrlar   | 120 |

|                    |                                                             |     |
|--------------------|-------------------------------------------------------------|-----|
| Human              | civrkdpafgwlqllqwlialpatfvnsairylegqlalsfrsrlvahayrlyfsqqty | 180 |
| Chimpanzee         | civrkdpafgwlqllqwlialpatfvnsairylegqlalsfrsrlvahayrlyfsqqty | 180 |
| Elephant           | civrkdpafgwlqllqwlialpatfvnsairylegqlalsfrsrlvahayrlyfsqqty | 180 |
| Gorilla            | civrkdpafgwlqllqwlialpatfvnsairylegqlalsfrsrlvahayrlyfsqqty | 180 |
| Green-Monkey       | civrkdpafgwlqllqwlialpatfvnsairylegqlalsfrsrlvahayrlyfsqqty | 176 |
| Jerboa             | civrkdpafgwlqllqwlialpatfvnsairylegqlalsfrsrlvahayrlyfsqqty | 180 |
| Macaque            | civrkdpafgwlqllqwlialpatfvnsairylegqlalsfrsrlvahayrlyfsqqty | 180 |
| Marmoset           | civrkdpafgwlqllqwlialpatfvnsairylegqlalsfrsrlvahayrlyfsqqty | 180 |
| Mouse              | civrkdpafgwlqllqwlialpatfvnsairylegqlalsfrsrlvahayrlyfsqqty | 180 |
| Orangutan          | civrkdpafgwlqllqwlialpatfvnsairylegqlalsfrsrlvahayrlyfsqqty | 180 |
| Panda              | civrkdpafgwlqllqwlialpatfvnsairylegqlalsfrsrlvahayrlyfsqqty | 180 |
| Pig                | civrkdpafgwlqllqwlialpatfvnsairylegqlalsfrsrlvahayrlyfsqqty | 180 |
| Pika               | civrkdpafgwlqllqwlialpatfvnsairylegqlalsfrsrlvahayrlyfsqqty | 180 |
| Prairie-deer-mouse | civrkdpafgwlqllqwlialpatfvnsairylegqlalsfrsrlvahayrlyfsqqty | 180 |
| Rabbit             | civrkdpafgwlqllqwlialpatfvnsairylegqlalsfrsrlvahayrlyfsqqty | 180 |
| Rat                | civrkdpafgwlqllqwlialpatfvnsairylegqlalsfrsrlvahayrlyfsqqty | 180 |
| Rhesus-Monkey      | civrkdpafgwlqllqwlialpatfvnsairylegqlalsfrsrlvahayrlyfsqqty | 180 |
| Seal               | civrkdpafgwlqllqwlialpatfvnsairylegqlalsfrsrlvahayrlyfsqqty | 180 |
| Squirrel-Monkey    | civrkdpafgwlqllqwlialpatfvnsairylegqlalsfrsrlvahayrlyfsqqty | 180 |
| Tarsier            | civrkdpafgwlqllqwlialpatfvnsairylegqlalsfrsrlvahayrlyfsqqty | 180 |
| Tasmanian-devil    | -ivrkdpafgwlqllqwlialpatfvnsairylegqlalsfrsrlvahayrlyfsqqty | 59  |
| Walrus             | civrkdpafgwlqllqwlialpatfvnsairylegqlalsfrsrlvahayrlyfsqqty | 180 |
| Water-buffalo      | civrkdpafgwlqllqwlialpatfvnsairylegqlalsfrsrlvahayrlyfsqqty | 117 |
| White-Rhinoceros   | civrkdpafgwlqllqwlialpatfvnsairylegqlalsfrsrlvahayrlyfsqqty | 179 |
| Yak                | civrkdpafgwlqllqwlialpatfvnsairylegqlalsfrsrlvahayrlyfsqqty | 162 |
| Aardvark           | civrkdpafgwlqllqwlialpatfvnsairylegqlalsfrsrlvahayrlyfsqqty | 174 |
| Alpaca             | civrkdpafgwlqllqwlialpatfvnsairylegqlalsfrsrlvahayrlyfsqqty | 178 |
| Armadillo          | civrkdpafgwlqllqwlialpatfvnsairylegqlalsfrsrlvahayrlyfsqqty | 180 |
| Baboon             | civrkdpafgwlqllqwlialpatfvnsairylegqlalsfrsrlvahayrlyfsqqty | 180 |
| Bat                | civrkdpafgwlqllqwlialpatfvnsairylegqlalsfrsrlvahayrlyfsqqty | 180 |
| Cat                | civrkdpafgwlqllqwlialpatfvnsairylegqlalsfrsrlvahayrlyfsqqty | 180 |
| Chinchilla         | civrkdpafgwlqllqwlialpatfvnsairylegqlalsfrsrlvahayrlyfsqqty | 180 |
| Chinese-hamster    | civrkdpafgwlqllqwlialpatfvnsairylegqlalsfrsrlvahayrlyfsqqty | 180 |
| Cow                | civrkdpafgwlqllqwlialpatfvnsairylegqlalsfrsrlvahayrlyfsqqty | 180 |
| Dog                | civrkdpafgwlqllqwlialpatfvnsairylegqlalsfrsrlvahayrlyfsqqty | 180 |

|                    |                                                             |     |
|--------------------|-------------------------------------------------------------|-----|
| Dolphin            | civrkdpfagwqllqwlallpatfvnsairylegrlalafrsrlvahayslyfsqqty  | 113 |
| Ferret             | givrkdprafgwqllqwlallpatfinsairflegqlalsfrsrlvahayslyfsqqty | 180 |
| Florida-manatee    | civrkdpfagwqllqwlallpatfinsairylegqlalsfrsrlvahayslyfsqqty  | 179 |
| Flying-Fox         | civrkdpfagwqllqwlallpatfinsairflegqlalsfrsrlvahayslyfsqqty  | 180 |
| Golden-hamster     | civrkdpfagwqllqwlallpatfinsairylegqlalsfrsrlvahayslyfsqqty  | 178 |
| Ground-Squirrel    | civrkdpfagwqllqwlallpatfinsairylegqlalsfrsrlvahayslyfsqqty  | 180 |
| Guinea-pig         | civrkdpfagwqllqwlallpaxfvnsairylegqlalsfrsrlvahayslyfsqqty  | 180 |
| Hedgehog           | civrkdpfagwqllqwlallpatfinsairylegqlalafrsrlvahayslyfsqqty  | 179 |
| Horse              | civrkdpqafgwqllqwlallpatfinsairylegqlalsfrsrlvahayslyfsqqty | 180 |
| Lemur              | civrkdpfagwqllqwlallpatfinsairylegqlalsfrsrlvahayslyfsqqty  | 180 |
| Minke-whale        | civrkdpfagwqllqwlallpatfvnsairylegrlalafrsrlvahayslyfsqqty  | 160 |
| Mole-rat           | civrkdpfagwqllqwlallpatfinsairylegqlalafrsrlvahayslyfsqqty  | 180 |
| Naked-mole-rat     | civrkdpfagwqllqwlallpatfvnsairylegqlalsfrsrlvahayslyfsqqty  | 180 |
| Opposum            | civrkdpfagwqllqwlallpatfvnsairylegrlalafrsrlvahayslyfsqqty  | 103 |
| Orca               | civrkdpfagwqllqwlallpatfvnsairylegrlalafrsrlvahayslyfsqqty  | 180 |
| Prairie-vole       | civrkdpfagwqllqwlallpatfinsairylegqlalsfrsrlvahayslyfsqqty  | 180 |
| Python             | civrkdpfagwqllqwlallpatfvnsairylegqlalsfrsrlvahayslyfsqqty  | 121 |
| Small-eared-galago | civrkdpqafgwqllqwlallpatfinsairylegqlalsfrsrlvahayslyfsqqty | 180 |
| Sperm-whale        | civrkdpfagwqllqwlallpatfvnsairylegrlalafrsrlvahayslyfsqqty  | 180 |

|                    |                                                                |     |
|--------------------|----------------------------------------------------------------|-----|
| Human              | yrvsnmdgrlnrnpdqsltedvvaafaasvahlysnltkplldvavtsytlrraarsrgagt | 240 |
| Chimpanzee         | yrvsnmdgrlnrnpdqsltedvvaafaasvahlysnltkplldvavtsytlrraarsrgagt | 240 |
| Elephant           | yrvsnmdgrlnrnpdqsltedvvaafaasvahlysnltkplldvavtsytlrraarsrgagt | 240 |
| Gorilla            | yrvsnmdgrlnrnpdqsltedvvaafaasvahlysnltkplldvavtsytlrraarsrgagt | 240 |
| Green-Monkey       | yrvsnmdgrlnrnpdqsltedvvaafaasvahlysnltkplldvavtsytlrraarsrgagt | 236 |
| Jerboa             | yrvsnmdgrlnrnpdqsltedvvaafaasvahlysnltkplldvavtsytlrraarsrgagt | 240 |
| Macaque            | yrvsnmdgrlnrnpdqsltedvvaafaasvahlysnltkplldvavtsytlrraarsrgagt | 240 |
| Marmoset           | yrvsnmdgrlnrnpdqsltedvvaafaasvahlysnltkplldvavtsytlrraarsrgagt | 240 |
| Mouse              | yrvsnmdgrlnrnpdqsltedvvaafaasvahlysnltkplldvavtsytlrraarsrgagt | 240 |
| Orangutan          | yrvsnmdgrlnrnpdqsltedvvaafaasvahlysnltkplldvavtsytlrraarsrgagt | 240 |
| Panda              | yrvsnmdgrlnrnpdqsltedvvaafaasvahlysnltkplldvavtsytlrraarsrgagt | 240 |
| Pig                | yrvsnmdgrlnrnpdqsltedvvaafaasvahlysnltkplldvavtsytlrraarsrgagt | 240 |
| Pika               | yrvsnmdgrlnrnpdqsltedvvaafaasvahlysnltkplldvavtsytlrraarsrgagt | 240 |
| Prairie-deer-mouse | yrvsnmdgrlnrnpdqsltedvvaafaasvahlysnltkplldvavtsytlrraarsrgagt | 240 |
| Rabbit             | yrvsnmdgrlnrnpdqsltedvvaafaasvahlysnltkplldvavtsytlrraarsrgagt | 240 |
| Rat                | yrvsnmdgrlnrnpdqsltedvvaafaasvahlysnltkplldvavtsytlrraarsrgagt | 240 |
| Rhesus-Monkey      | yrvsnmdgrlnrnpdqsltedvvaafaasvahlysnltkplldvavtsytlrraarsrgagt | 240 |
| Seal               | yrvsnmdgrlnrnpdqsltedvvaafaasvahlysnltkplldvavtsytlrraarsrgagt | 240 |
| Squirrel-Monkey    | yrvsnmdgrlnrnpdqsltedvvaafaasvahlysnltkplldvavtsytlrraarsrgagt | 240 |
| Tarsier            | yrvsnmdgrlnrnpdqsltedvvaafaasvahlysnltkplldvavtsytlrraarsrgagt | 240 |
| Tasmanian-devil    | yrvsnmdgrlnrnpdqsltedvvaafaasvahlysnltkplldvavtsytlrraarsrgagt | 119 |
| Walrus             | yrvsnmdgrlnrnpdqsltedvvaafaasvahlysnltkplldvavtsytlrraarsrgagt | 240 |
| Water-buffalo      | yrvsnmdgrlnrnpdqsltedvvaafaasvahlysnltkplldvavtsytlrraarsrgagt | 177 |
| White-Rhinoceros   | yrvsnmdgrlnrnpdqsltedvvaafaasvahlysnltkplldvavtsytlrraarsrgagt | 239 |
| Yak                | yrvsnmdgrlnrnpdqsltedvvaafaasvahlysnltkplldvavtsytlrraarsrgagt | 222 |
| Aardvark           | yrvsnmdgrlnrnpdqsltedvvaafaasvahlysnltkplldvavtsytlrraarsrgagt | 234 |
| Alpaca             | yrvsnmdgrlnrnpdqsltedvvaafaasvahlysnltkplldvavtsytlrraarsrgagt | 238 |
| Armadillo          | yrvsnmdgrlnrnpdqsltedvvaafaasvahlysnltkplldvavtsytlrraarsrgagt | 240 |
| Baboon             | yrvsnmdgrlnrnpdqsltedvvaafaasvahlysnltkplldvavtsytlrraarsrgagt | 240 |
| Bat                | yrvsnmdgrlnrnpdqsltedvvaafaasvahlysnltkplldvavtsytlrraarsrgagt | 240 |
| Cat                | yrvsnmdgrlnrnpdqsltedvvaafaasvahlysnltkplldvavtsytlrraarsrgagt | 240 |
| Chinchilla         | yrvsnmdgrlnrnpdqsltedvvaafaasvahlysnltkplldvavtsytlrraarsrgagt | 240 |
| Chinese-hamster    | yrvsnmdgrlnrnpdqsltedvvaafaasvahlysnltkplldvavtsytlrraarsrgagt | 240 |
| Cow                | yrvsnmdgrlnrnpdqsltedvvaafaasvahlysnltkplldvavtsytlrraarsrgagt | 240 |
| Dog                | yrvsnmdgrlnrnpdqsltedvvaafaasvahlysnltkplldvavtsytlrraarsrgagt | 240 |
| Dolphin            | yrvsnmdgrlnrnpdqsltedvvaafaasvahlysnltkplldvavtsytlrraarsrgagt | 173 |
| Ferret             | yrvsnmdgrlnrnpdqsltedvvaafaasvahlysnltkplldvavtsytlrraarsrgagt | 240 |
| Florida-manatee    | yrvsnmdgrlnrnpdqsltedvvaafaasvahlysnltkplldvavtsytlrraarsrgagt | 239 |
| Flying-Fox         | yrvsnmdgrlnrnpdqsltedvvaafaasvahlysnltkplldvavtsytlrraarsrgagt | 240 |
| Golden-hamster     | yrvsnmdgrlnrnpdqsltedvvaafaasvahlysnltkplldvavtsytlrraarsrgagt | 238 |
| Ground-Squirrel    | yrvsnmdgrlnrnpdqsltedvvaafaasvahlysnltkplldvavtsytlrraarsrgagt | 240 |
| Guinea-pig         | yrvsnmdgrlnrnpdqsltedvvaafaasvahlysnltkplldvavtsytlrraarsrgagt | 240 |
| Hedgehog           | yrvsnmdgrlnrnpdqsltedvvaafaasvahlysnltkplldvavtsytlrraarsrgagt | 239 |
| Horse              | yrvsnmdgrlnrnpdqsltedvvaafaasvahlysnltkplldvavtsytlrraarsrgagt | 240 |
| Lemur              | yrvsnmdgrlnrnpdqsltedvvaafaasvahlysnltkplldvavtsytlrraarsrgagt | 240 |
| Minke-whale        | yrvsnmdgrlnrnpdqsltedvvaafaasvahlysnltkplldvavtsytlrraarsrgagt | 220 |
| Mole-rat           | yrvsnmdgrlnrnpdqsltedvvaafaasvahlysnltkplldvavtsytlrraarsrgagt | 240 |
| Naked-mole-rat     | yrvsnmdgrlnrnpdqsltedvvaafaasvahlysnltkplldvavtsytlrraarsrgagt | 240 |
| Opposum            | yrvsnmdgrlnrnpdqsltedvvaafaasvahlysnltkplldvavtsytlrraarsrgagt | 163 |
| Orca               | yrvsnmdgrlnrnpdqsltedvvaafaasvahlysnltkplldvavtsytlrraarsrgagt | 240 |
| Prairie-vole       | yrvsnmdgrlnrnpdqsltedvvaafaasvahlysnltkplldvavtsytlrraarsrgagt | 240 |
| Python             | yrvsnmdgrlnrnpdqsltedvvaafaasvahlysnltkplldvavtsytlrraarsrgagt | 181 |
| Small-eared-galago | yrvsnmdgrlnrnpdqsltedvvaafaasvahlysnltkplldvavtsytlrraarsrgagt | 240 |
| Sperm-whale        | yrvsnmdgrlnrnpdqsltedvvaafaasvahlysnltkplldvavtsytlrraarsrgagt | 240 |

|                    |                                                               |     |
|--------------------|---------------------------------------------------------------|-----|
| Human              | awpsaiaglvvfltanvlfrafspkfgelvaeearrkgelrymhsrvvanseeiafygghe | 300 |
| Chimpanzee         | awpsaiaglvvfltanvlfrafspkfgelvaeearrkgelrymhsrvvanseeiafygghe | 300 |
| Elephant           | awpsaiaglvvfltanvlfrafspkfgelvaeearrkgelrymhsrvvanseeiafygghe | 300 |
| Gorilla            | awpsaiaglvvfltanvlfrafspkfgelvaeearrkgelrymhsrvvanseeiafygghe | 300 |
| Green-Monkey       | awpsaiaglvvfltanvlfrafspkfgelvaeearrkgelrymhsrvvanseeiafygghe | 296 |
| Jerboa             | awpsaiaglvvfltanvlfrafspkfgelvaeearrkgelrymhsrvvanseeiafygghe | 300 |
| Macaque            | awpsaiaglvvfltanvlfrafspkfgelvaeearrkgelrymhsrvvanseeiafygghe | 300 |
| Marmoset           | awpsaiaglvvfltanvlfrafspkfgelvaeearrkgelrymhsrvvanseeiafygghe | 300 |
| Mouse              | awpsaiaglvvfltanvlfrafspkfgelvaeearrkgelrymhsrvvanseeiafygghe | 300 |
| Orangutan          | awpsaiaglvvfltanvlfrafspkfgelvaeearrkgelrymhsrvvanseeiafygghe | 300 |
| Panda              | awpsaiaglvvfltanvlfrafspkfgelvaeearrkgelrymhsrvvanseeiafygghe | 300 |
| Pig                | awpsaiaglvvfltanvlfrafspkfgelvaeearrkgelrymhsrvvanseeiafygghe | 300 |
| Pika               | awpsaiaglvvfltanvlfrafspkfgelvaeearrkgelrymhsrvvanseeiafygghe | 300 |
| Prairie-deer-mouse | awpsaiaglvvfltanvlfrafspkfgelvaeearrkgelrymhsrvvanseeiafygghe | 300 |
| Rabbit             | awpsaiaglvvfltanvlfrafspkfgelvaeearrkgelrymhsrvvanseeiafygghe | 300 |
| Rat                | awpsaiaglvvfltanvlfrafspkfgelvaeearrkgelrymhsrvvanseeiafygghe | 300 |
| Rhesus-Monkey      | awpsaiaglvvfltanvlfrafspkfgelvaeearrkgelrymhsrvvanseeiafygghe | 300 |
| Seal               | awpsaiaglvvfltanvlfrafspkfgelvaeearrkgelrymhsrvvanseeiafygghe | 300 |
| Squirrel-Monkey    | awpsaiaglvvfltanvlfrafspkfgelvaeearrkgelrymhsrvvanseeiafygghe | 300 |
| Tarsier            | awpsaiaglvvfltanvlfrafspkfgelvaeearrkgelrymhsrvvanseeiafygghe | 300 |
| Tasmanian-devil    | awpsaiaglvvfltakvlracspkfgelvaeearrkgelrymhsrvvanseeiafygghe  | 179 |
| Walrus             | awpsaiaglvvfltanvlfrafspkfgelvaeearrkgelrymhsrvvanseeiafygghe | 300 |
| Water-buffalo      | awpsaiaglvvfltanvlfrafspkfgelvaeearrkgelrymhsrvvanseeiafygghe | 237 |
| White-Rhinoceros   | awpsaiaglvvfltanvlfrafspkfgelvaeearrkgelrymhsrvvanseeiafygghe | 299 |
| Yak                | awpsaiaglvvfltanvlfrafspkfgelvaeearrkgelrymhsrvvanseeiafygghe | 282 |
| Aardvark           | awpsaiaglvvfltanilrafspkfgelvaeearrkgelrymhsrvvanseeiafygghe  | 294 |
| Alpaca             | awpsaiaglvvfltanvlfrafspkfgelvaeearrkgelrymhsrvvanseeiafygghe | 298 |
| Armadillo          | awpsaiaglavfltanvlfrafspkfgelvaeearrkgelrymhsrvvanseeiafygghe | 300 |
| Baboon             | awpsaiaglvvfltanvlfrafspkfgelvaeearrkgelrymhsrvvanseeiafygghe | 300 |
| Bat                | awpsaiaglvvfltanvlfrafspkfgelvaeearrkgelrymhsrvvanseeiafygghe | 300 |
| Cat                | awpsaiaglvfltanvlfrafspkfgelvaeearrkgelrymhsrvvanseeiafygghe  | 300 |
| Chinchilla         | awpsaiaglvvfltanvlfrafspkfgelvaeearrkgelrymhsrvvanseeiafygghe | 300 |
| Chinese-hamster    | awpsaiaglvvfltanvlfrafspkfgelvaeearrkgelrymhsrvvanseeiafygghe | 300 |
| Cow                | awpsaiaglvvfltanvlfrafspkfgelvaeearrkgelrymhsrvvanseeiafygghe | 300 |
| Dog                | awpsaiaglvvfltanvlfrafspkfgelvaeearrkgelrymhsrvvanseeiafygghe | 300 |
| Dolphin            | awpsaiaglvvfltanvlfrafspkfgelvaeearrkgelrymhsrvvanseeiafygghe | 233 |
| Ferret             | awpsaiaglvvfltanvlfrafspkfgelvaeearrkgelrymhsrvvanseeiafygghe | 300 |
| Florida-manatee    | awplaiaglvvfltanvlrtfispkfgelvaeearrkgelrymhsrvvanseeiafygghe | 299 |
| Flying-Fox         | awpsaiaglvvfltanvlfrafspkfgelvaeearrkgelrymhsrvvanseeiafygghe | 300 |
| Golden-hamster     | awpsaiaglvvfltanvlfrafspkfgelvaeearrkgelrymhsrvvanseeiafygghe | 298 |
| Ground-Squirrel    | awpsaiaglvvfltanvlfrafspkfgelvaeearrkgelrymhsrvvanseeiafygghe | 300 |
| Guinea-pig         | awpsaiaglvvfltanvlfrafspkfgelvaeearrkgelrymhsrvvanseeiafygghe | 300 |
| Hedgehog           | awplaiaglvvfltanvlfrafspkfgelvaeearrkgelrymhsrvvanseeiafygghe | 299 |
| Horse              | awpsaiaglvvfltanvlfrafspkfgelvaeearrkgelrymhsrvvanseeiafygghe | 300 |
| Lemur              | awpsaiaglvvfltanvlfrafspkfgelvaeearrkgelrymhsrvvanseeiafygghe | 300 |
| Minke-whale        | awpsaiaglvvfltanvlfrafspkfgelvaeearrkgelrymhsrvvanseeiafygghe | 280 |
| Mole-rat           | awpsaiaglvvfltanvlfrafspkfgelvaeearrkgelrymhsrvvanseeiafygghe | 300 |
| Naked-mole-rat     | awpsaiaglvvfltanvlfrafspkfgelvaeearrkgelrymhsrvvanseeiafygghe | 300 |
| Opposum            | twpsaiaglvvfltakvlracspkfgelvaeearrkgelrymhsrvvanseeiafygghe  | 223 |
| Orca               | awpsaiaglvvfltanvlfrafspkfgelvaeearrkgelrymhsrvvanseeiafygghe | 300 |
| Prairie-vole       | awpsaiaglvvfltanvlfrafspkfgelvaeearrkgelrymhsrvvanseeiafygghe | 300 |
| Python             | awpsviaglvvcitakvlracspkfgelvaeearrkgelrymhsrvvanseeiafygghe  | 241 |
| Small-eared-galago | awpsaiaglvvfltanvlfrafspkfgelvaeearrkgelrymhsrvvanseeiafygghe | 300 |
| Sperm-whale        | awpsaiaglvvfltanvlfrafspkfgelvaeearrkgelrymhsrvvanseeiafygghe | 300 |

|                    |                                                             |     |
|--------------------|-------------------------------------------------------------|-----|
| Human              | velallqrsyqdasqinlillerlwyvmleqflmkyvwsasgllmvavpiitatgyes  | 360 |
| Chimpanzee         | velallqrsyqdasqinlillerlwyvmleqflmkyvwsasgllmvavpiitatgyes  | 360 |
| Elephant           | velallrhsyqdasqinlillerlwyvmleqflmkyvwsasgllmvavpiitatgyes  | 360 |
| Gorilla            | velallqrsyqdasqinlillerlwyvmleqflmkyvwsasgllmvavpiitatgyes  | 360 |
| Green-Monkey       | velallqhsyqdasqinlillerlwyvmleqflmkyvwsasgllmvavpiitatgyes  | 356 |
| Jerboa             | velallqhsyrdasqinlillerlwyvmleqflmkyvwsasgllmvavpiitatgyes  | 360 |
| Macaque            | velallqhsyqdasqinlillerlwyvmleqflmkyvwsasgllmvavpiitatgyset | 360 |
| Marmoset           | velallqhsyqdasqinlillerlwyvmleqflmkyvwsasgllmvavpiitatgyes  | 360 |
| Mouse              | velallqhsyqdasqinlillerlwyvmleqflmkyvwsasgllmvavpiitatgyaes | 360 |
| Orangutan          | velallqrsyqdasqinlillerlwyvmleqflmkyvwsasgllmvavpiitatgyes  | 360 |
| Panda              | velallqhsyqdasqinlillerlwyimleqflmkyvwsasgllmvavpiitatgyes  | 360 |
| Pig                | velallqhsyqdasqinlillerlwyvmleqflmkyvwsasgllmvavpiitatgyes  | 360 |
| Pika               | velallrrsyqdasqihlillerlwyvmleqflmkyvwsasgllmvavpiitatgyes  | 360 |
| Prairie-deer-mouse | velallqhsyqdasqinlillerlwyvmleqflmkyvwsasgllmvavpiitatgyaes | 360 |
| Rabbit             | velallqrsyqdasqihlillerlwyvmleqflmkyvwsasgllmvavpiitatgyes  | 360 |
| Rat                | velallqhsyqdasqinlillerlwyvmleqflmkyvwsasgllmvavpiitatgyaes | 360 |
| Rhesus-Monkey      | velallqhsyqdasqinlillerlwyvmleqflmkyvwsasgllmvavpiitatgyset | 360 |
| Seal               | velallqhsyqdasqinlillerlwyimleqflmkyvwsasgllmvavpiitatgyes  | 360 |
| Squirrel-Monkey    | velallqhsyqdasqinlillerlwyvmleqflmkyvwsasgllmvavpiitatgyes  | 360 |
| Tarsier            | velallqhsyqdasqinlillerlwyvmleqflmkyvwsasgllmvavpiitatgyes  | 360 |

|                    |                                                             |     |
|--------------------|-------------------------------------------------------------|-----|
| Tasmanian-devil    | velallqhsyqdasqinlillerlwyvmleqflmkyvwsasglmvavpiitavgys    | 239 |
| Walrus             | velallqhsyqdasqinlillerlwyimleqflmkyvwsasgllmvavpiitatgys   | 360 |
| Water-buffalo      | velallqhsyqdasqinlillerlwyvmleqflmkyvwsasgllmvavpiitatgys   | 297 |
| White-Rhinoceros   | velallqhsyqdasqinlillerlwyvmleqflmkyvwsasgllmvavpiitatgys   | 359 |
| Yak                | velallqhsyqdasqinlillerlwyvmleqflmkyvwsasgllmvavpiitatgys   | 342 |
| Aardvark           | velallrlsyqdasqinlillerlwyvmleqflmkyvwsasgllmvavpiitatgys   | 354 |
| Alpaca             | velallqhsyqdasqinlillerlwyvmleqflmkyvwsasglmvavpiitatgys    | 358 |
| Armadillo          | velallqqsyrldasqinlillerlwyvmleqflmkyvwsasglmvavpiitatgfs   | 360 |
| Baboon             | velallqhsyqdasqinlillerlwyvmleqflmkyvwsasgllmvavpiitatgys   | 360 |
| Bat                | velallqhsykalasqinlillerlwyvmleqflmkyvwsasgllmvavpiitatgfs  | 360 |
| Cat                | velallrhsyqdasqinlillerlwyimleqflmkyvwsasgllmvavpiitatgys   | 360 |
| Chinchilla         | velallrdcyralaasqinlillerlwyvmleqflmkyvwsasgllmvavpiitatgys | 360 |
| Chinese-hamster    | velallrqsyqdasqinlillerlwyvmleqflmkyvwsasgllmvavpiitatgys   | 360 |
| Cow                | velallqhsyqdasqinlillerlwyvmleqflmkyvwsasgllmvavpiitatgys   | 360 |
| Dog                | velallqhsyqdasqinlillerlwyimleqflmkyvwsasgllmvavpiitatgys   | 360 |
| Dolphin            | velallqhsyqdasqinlillerlwyvmleqflmkyvwsasgllmvavpiitatgha   | 293 |
| Ferret             | velallqqsyqdasqihlillerlwyitleqflmkyvwsasgllmvavpiitatgys   | 360 |
| Florida-manatee    | velallqhsyeelasqinlillerlwyvmleqflmkyvwsasgllmvavpiitatgys  | 359 |
| Flying-Fox         | velallqhsykalasqinlillerlwyvmleqflmkyvwsasgllmvavpiitatgys  | 360 |
| Golden-hamster     | velallqqsyqdasqinlillerlwyvmleqflmkyvwsasgllmvavpiitatgys   | 358 |
| Ground-Squirrel    | velaqlqhsyqdasqinlillerlwyvmleqflmkyvwsasgllmvavpiitatgys   | 360 |
| Guinea-pig         | velallrdcyralaasqinlillerlwyvmleqflmkyvwsasgllmvavpiitatgys | 360 |
| Hedgehog           | veltlqlsykdashinlillerlwyvmleqflmkyvwsasgllmvavpiitatgys    | 359 |
| Horse              | velallqhsyqdasqinlillerlwyvmleqflmkyvwsasgllmvavpiitatgys   | 360 |
| Lemur              | velallqhsyqdasqinlillerlwyvmleqflmkyvwsasgllmvavpiitatgys   | 360 |
| Minke-whale        | velallqhsyqdasqinlillerlwyvmleqflmkyvwsasgllmvavpiitatgys   | 340 |
| Mole-rat           | velallqhsyrdasqinlillerlwyimleqflmkyvwsasgllmvavpiitatgys   | 360 |
| Naked-mole-rat     | velallqdcyralaasqinlillerlwyvmleqflmkyvwsasgllmvavpiitatgys | 360 |
| Opposum            | velallrhsyqdasqinlillerlwyvmleqflmkyvwsasglmvavpiitatgys    | 283 |
| Orca               | velallqhsyqdasqinlillerlwyvmleqflmkyvwsasgllmvavpiitatgha   | 360 |
| Prairie-vole       | velallqhsyqdasqinlillerlwyvmleqflmkyvwsasgllmvavpiitatgys   | 360 |
| Python             | velslrrhcyhelasqinlillerlwyvmleqflmkyvwsaaglmvavpiitatgys   | 301 |
| Small-eared-galago | velallqhsyqdasqinlillerlwyvmleqflmkyvwsasgllmvavpiitatgys   | 360 |
| Sperm-whale        | velallqhsyqdasqinlillerlwyvmleqflmkyvwsasgllmvavpiitatgys   | 360 |

|                    |                                                               |     |
|--------------------|---------------------------------------------------------------|-----|
| Human              | daeavkkaalekkeeeelvserteaftiarnlltaaadaierimssykevtelagytarvh | 420 |
| Chimpanzee         | daeavkkaalekkeeeelvserteaftiarnlltaaadaierimssykevtelagytarvh | 420 |
| Elephant           | dseavrkaalekreeeelvserteaftiarnlltaaadaierimssykevtelagytarvh | 420 |
| Gorilla            | daeavkkaalekkeeeelvserteaftiarnlltaaadaierimssykevtelagytarvh | 420 |
| Green-Monkey       | aaeavkkaalekkeeeelvserteaftiarnlltaaadaierimssykevtelagytaqv  | 416 |
| Jerboa             | dseamkkaalekkeeeelvserteaftiarnlltaaadaterimssykevtelagytarvh | 420 |
| Macaque            | daeavkkaalekkeeeelvserteaftiarnlltaaadaierimssykevtelagytarvh | 420 |
| Marmoset           | daeavrksalekkeeeelvserteaftiarnlltaaadaterimssykevtelagytarvh | 420 |
| Mouse              | dseamkkaalekkeeeelvserteaftiarnlltaaadaterimssykevtelagytarvy | 420 |
| Orangutan          | daeavkkaalekkeeeelvserteaftiarnlltaaadaierimssykevtelagytarvh | 420 |
| Panda              | dseavkkaalekkeeeelvserteaftiarnlltaaadaierimssykevtelagytarvh | 420 |
| Pig                | dseavkkaalekkeeeelvserteaftiarnlltaaadaierimssykevtelagytarvh | 420 |
| Pika               | dsedvkaamekkeeeelvserteaftiarnlltaaadaierimssykevtelagytarvh  | 420 |
| Prairie-deer-mouse | dseamkkaalekkeeeelvserteaftiarnlltaaadaterimssykevtelagytarvy | 420 |
| Rabbit             | dseavkkaalakkeeeelvserteaftiarnlltaaadaierimssykevtelagytarvh | 420 |
| Rat                | dseamkkaalekkeeeelvserteaftiarnlltaaadaterimssykevtelagytarvy | 420 |
| Rhesus-Monkey      | daeavkkaalekkeeeelvserteaftiarnlltaaadaierimssykevtelagytarvh | 420 |
| Seal               | dleavkkaalekkeeeelvserteaftiarnlltaaadaierimssykevtelagytarvy | 420 |
| Squirrel-Monkey    | daeavrksalekkeeeelvserteaftiarnlltaaadaterimssykevtelagytarvh | 420 |
| Tarsier            | dseavkkaalekkeeeelvserteaftiarnlltaaadaierimssykevtelagytarvh | 420 |
| Tasmanian-devil    | dseavkkaalekkeeeelvserteaftiarnlltaaadaierimssykevtelagytarvy | 299 |
| Walrus             | dseavkkaalekkeeeelvserteaftiarnlltaaadaierimssykevtelagytarvh | 420 |
| Water-buffalo      | dsetvkkaaamkegelvserteaftiarnlltaaadaierimssykevtelagytarvy   | 357 |
| White-Rhinoceros   | aseamkkaalekkeeeelvserteaftiarnlltaaadaierimssykevtelagytarvh | 419 |
| Yak                | dsetvkkaaamkegelvserteaftiarnlltaaadaierimssykevtelagytarvy   | 402 |
| Aardvark           | dseavkkaalekkeeeelvserteaftiarnlltaaadaierimssykevtelagytarvh | 414 |
| Alpaca             | dpevvkkaalekkeeeelvserteaftiarnlltaaadaierimssykevtelagytarvh | 418 |
| Armadillo          | dpeavkqaalekkeeeelvserteaftiarslltaaadaierimssykevtelagytarvh | 420 |
| Baboon             | daeavkkaalekkeeeelvserteaftiarnlltaaadaierimssykevtelagytarvh | 420 |
| Bat                | dpeavkkaalamkeeeelvserteaftiarnlltaaadaierimssykevtelagytarvh | 420 |
| Cat                | dseavkkaalekkeeeelvserteaftiarnlltaaadaierimssykevtelagytarvh | 420 |
| Chinchilla         | dseatkraalekkeeeelvserteaftiarnlltaaadaierimssykevtelagytarvh | 420 |
| Chinese-hamster    | dsetmkkaalekkeeeelvserteaftiarnlltaaadaterimssykevtelagytarvy | 420 |
| Cow                | dsetvkkaaamkegelvserteaftiarnlltaaadaierimssykevtelagytarvy   | 420 |
| Dog                | dseavkkaalekkeeeelvserteaftiarnlltaaadaierimssykevtelagytarvh | 420 |
| Dolphin            | dseavkkaalekkeeeelvserteaftiarnlltaaadaierimssykevtelagytarvh | 353 |
| Ferret             | dpeavkkaalekkeeeelvserteaftiarnlltaaadaierimssykevtelagytarvh | 420 |
| Florida-manatee    | dseavkkaalekkeeeelvserteaftiarnlltaaadaierimssykevtelagytarvh | 419 |
| Flying-Fox         | dteavkkaalekkeeeelvserteaftiarnlltaaadaierimssykevtelagytarvh | 420 |
| Golden-hamster     | dseamkkaalekkeeeelvserteaftiarnlltaaadaterimssykevtelagytarvy | 418 |
| Ground-Squirrel    | dsedmkkaalekkeeeelvserteaftiarnlltaaadaterimssykevtelagytarvh | 418 |

|                    |                                                              |     |
|--------------------|--------------------------------------------------------------|-----|
| Guinea-pig         | dseaaqraalemqeeelvserteaftiarnlltaaadaterimssykevtelagytarvy | 420 |
| Hedgehog           | eeavkkaamenreeelvserteaftiarnlltaadaierimssykevtelagytarvh   | 419 |
| Horse              | dsealkkaasemreeelvserteaftiarnlltaadaierimssykevtelagytarvh  | 420 |
| Lemur              | dseamkkavlekrdeelvserteaftiarnlltaadaierimssykevtelagytarvh  | 420 |
| Minke-whale        | dsevakkaalqtrgeelvserteaftvarnlltaadaiervmasykevtelagytarvh  | 400 |
| Mole-rat           | dseamkkaalemkeeelvserteaftiarnlltaaadaterimssykevtelagytarvy | 420 |
| Naked-mole-rat     | dseakraalemreeelvserteaftiarnlltaaadaterimssykevtelagytarvh  | 420 |
| Opposum            | dseavkkaalemkeedlvserteaftiarnlltaadaiervmssykeitelagytarvf  | 343 |
| Orca               | dsevakkaaleareelvserteaftiarnlltaadaiervmssykevtelagytarvh   | 420 |
| Prairie-vole       | dseamkkaalemkeeelvserteaftiarnlltaaadaterimssykevtelagytarvy | 420 |
| Python             | dseavkqaalemekewislrteafttarslltaaadatervissykeatelagytarvy  | 361 |
| Small-eared-galago | dseatkkaalekreelvserteaftiarnlltaadaierimssykevtelagytarvh   | 420 |
| Sperm-whale        | dsevakkaaleareelvserteaftiarnlltaadaiervmssykevtelagytarvh   | 420 |

|                    |                                                                |     |
|--------------------|----------------------------------------------------------------|-----|
| Human              | emfqvfedvqrchfkrpreledaqagsgtigrsgvrvegplkirgqvvdveggiicenip   | 480 |
| Chimpanzee         | emfqvfedvhrchfkrpreledaqagsgtigrsgvrvegplkirgqvvdveggiicenip   | 480 |
| Elephant           | emfqvfkdvqhchfkrpgepedapvgpgavvssgvhvegplkirgqvvdvehgiicenip   | 480 |
| Gorilla            | emfqvfedvqrchfkrpreledaqagsgtigrsgvrvegplkirgqvvdveggiicenip   | 480 |
| Green-Monkey       | emfqvfedvqrchfkrpgeledaqagsgtigrsgvrvegplkirgqvvdveggiicenip   | 476 |
| Jerboa             | emfqvfedvqhcrfkrpgefedahgtgalvrsgvrvegplkiqqqvvdveggiicenip    | 480 |
| Macaque            | emfqvfedvqrchfkrpreledaqagsgtigrsgvrvegplkirgqvvdveggiicenip   | 480 |
| Marmoset           | emfqvfadvqrchfkrpgeledtqpssgtigragvrvegplkiqqqvvdveggiicenip   | 480 |
| Mouse              | emfqvfedvqrchfkrpreledaqagsgtigrsgvrvegplkiqqqvvdveggiicenip   | 480 |
| Orangutan          | emfqvfedvqrchfkrpreledaqagsgtigrsgvrvegplkiqqqvvdveggiicenip   | 480 |
| Panda              | emfqvfedvqhcrfkrpgeledaqagpgavarsgvrvegllqirgqvvdveggiicenip   | 480 |
| Pig                | emfqvfedvqhcrfkrpgepedaqagsgavvrsgvrvegplqirgqvvdvehgivicenip  | 480 |
| Pika               | emfqvfedvqrchfkrpreledaqagsgtigrsgvrvegplkirgqvvdveggiicenip   | 480 |
| Prairie-deer-mouse | emfqvfedvqhcrfkrktgdleaaqarpgamvksgrvegplkiqqqvvdveggiicenip   | 480 |
| Rabbit             | emfqvfedvqhcrfkrpgepedaqigsgtvarsgrvdtplkirgqvvdveggiicenip    | 480 |
| Rat                | emfqvfedvqhcrfkrktgdleaaqagpgsmvhsghiegplkiqqqvvdveggiicenip   | 480 |
| Rhesus-Monkey      | emfqvfedvqrchfkrpreledaqagsgtigrsgvrvegplkirgqvvdveggiicenip   | 480 |
| Seal               | emfqvfedvqhchfkrpgepedpqaagpgavarsgvrvegplqirgqvvdveggiicenip  | 480 |
| Squirrel-Monkey    | emfqvfadvqrchfkrpgeledtqpssgtigragvrvegplkiqqqvvdveggiicenip   | 480 |
| Tarsier            | emfqvfedvqhcrfkrpgepedaqagsgamarsgvrlegslkirgqvvdveggiicenip   | 480 |
| Tasmanian-devil    | emfqvfedvqrgsfkrpgeledaqvgcgtvtrsgvrvdtplkirgqvvdveggiicenip   | 359 |
| Walrus             | emfqvfedvqhchfkrpgepedpqaagpgavarsgvrvegplqirgqvvdveggiicenip  | 480 |
| Water-buffalo      | emfqvfedvqqrchfkrpgepedahgtsgaimrsgvrvegplqirgqvvdveggivicenip | 417 |
| White-Rhinoceros   | emfqvfddvqhcrfkrpgepedtqvagavvkpgvrvegplqirgqvvdveggiicenip    | 479 |
| Yak                | emfqvfedvqqrchfkrpgeledtqagsgaimrsgirmegplqirgqvvdveggiicenip  | 462 |
| Aardvark           | emfqvfedvqhcrfkrpgepedapgdsgavvrhgvrvegplkirgqvvdveggiicenip   | 474 |
| Alpaca             | emfqvfedvqhcrfkrpgepedaqagsgavvrsgtrvegplqirgqvvdveggivicenip  | 478 |
| Armadillo          | emfqvfkdvqhchfkrpgelekaqaggagavvrpgvvhmegpprigrqvvdveggiicenip | 480 |
| Baboon             | emfqvfedvqrchfkrpgeledtqagsgaimrsgtrvegplkirgqvvdveggiicenip   | 480 |
| Bat                | emfqvfedvqhcrfkrpgepedaqagagavvrsgvrvegplqirgqvvdveggivcdnip   | 480 |
| Cat                | emfqvfedvhrchfkrpgeledtqagagavarsgvrvegplqirgqvvdveggiicenip   | 480 |
| Chinchilla         | emfqvfedvqhcrfkrpgeledtqagagavarsgvrmegplriqqqvvdveggiicenip   | 480 |
| Chinese-hamster    | emfqvfedvqhchfkrktgdleaaqakpgamvqsgihvegplkiqqqvvdveggiicenip  | 480 |
| Cow                | emfqvfedvqqrchfkrpgepedahgtsgaimrsgirmegplqirgqvvdveggivicenip | 480 |
| Dog                | emfqvfedvqhcrfkrpgeledtqagpgavarsgvhvegplqirgqvvdveggiicenip   | 480 |
| Dolphin            | emfqvfedvqhcrfkrpgepedtqagsgavvrsgvrvegslqirgqvvdvergivicenip  | 413 |
| Ferret             | emfqvfedvqhcrfkrpgeledtqagpgavakpgvriegplqirgqvvdveggiicenip   | 480 |
| Florida-manatee    | emfqvfedvqhchfkrpgepedapvgpgavvsgvrvegplkirgqvvdveggitcenip    | 479 |
| Flying-Fox         | emfqvfeevqhcrfkrpgepedaqagsgavvrsgvrvegplkiqqqvvdveggiicdnip   | 480 |
| Golden-hamster     | emfqvfedvqhchfkrktgdleetqakpgatvqsgirvegplkiqqqvvdveggiicenip  | 478 |
| Ground-Squirrel    | emfqvfedvqhcrfkrpgeledtqagcgtmvrsgvrvegplkiqqqvvdveggiicenip   | 478 |
| Guinea-pig         | emfqvfedvqhcrfkrpgepedtqagtavvrsgirveaplrlirgqvvdveggiicenip   | 480 |
| Hedgehog           | emfqvfddvqhcrfkrpgeledssvrpgavmrpgvrvegplkilgqvvdveggiicenip   | 479 |
| Horse              | emfqvfedvqhcrfkrpgepedtqagpgamvksgrvegplqirgrvvdveggivicenip   | 480 |
| Lemur              | emfqvfedvqhcrfkrpgepevaqvggramvrsgvrvegplkirgqvvdveggiicenip   | 480 |
| Minke-whale        | emfqvfedvhrchfkrprepedtqagsgavvrsgvrvegslqirgqvvdveggivcedip   | 460 |
| Mole-rat           | emfqvfedvqhcrfkrpgdpeaahaasgvmvrsgvrriegplkiqqqvvdvehgiicenip  | 480 |
| Naked-mole-rat     | emfqvfedvqhchfkrpgepedaqtgagavvrsgvhllegplrlirgqvvdveggiicenip | 480 |
| Opposum            | emfqvfedvqggsfkrpgeledsp--ngmlvkhgvrmegplkirgqvvdveggiicenip   | 401 |
| Orca               | emfqvfedvqhcrfkrpgepedtqagsgavvrsgvrvegslqirgqvvdveggivicenip  | 480 |
| Prairie-vole       | emfqvfedvqhcrfkrktgdleaaqarpgamvrsgvrvegplkiqqqvvdveggiicenip  | 480 |
| Python             | emfqvfedvkcenfrpgeledtqagvrmkhgvrvegplqiagghvidvdhgiicenip     | 421 |
| Small-eared-galago | emfqvfedvqhchfkrpgeledaqagsgamvrsgvvhmegplkiqqqvvdveggiicenip  | 480 |
| Sperm-whale        | emfqvfedvhrchfkrpgepedaqagsgavvrsgvrvegslqirgqvvdveggivicenip  | 480 |

|              |                                                                |     |
|--------------|----------------------------------------------------------------|-----|
| Human        | ivtpsgevvvaslnirveegmhllitgpngcgksslfrilgglwptyyggvlykpppqrmf  | 540 |
| Chimpanzee   | ivtpsgevvvaslnirveegmhllitgpngcgksslfrilgglwptyyggvlykpppqrmf  | 540 |
| Elephant     | iiptpsgevvvaslnirveegmhllitgpngcgksslfrilgglwptyyggvlykpppqrmf | 540 |
| Gorilla      | ivtpsgevvvaslnirveegmhllitgpngcgksslfrilgglwptyyggvlykpppqrmf  | 540 |
| Green-Monkey | iiptpsgevvvaslnirveegmhllitgpngcgksslfrilgglwptyyggvlykpppqrmf | 536 |
| Jerboa       | iiptpsgevvvaslnirveegmhllitgpngcgksslfrilgglwptyyggvlykpppqrmf | 540 |

|                    |                                                                |     |
|--------------------|----------------------------------------------------------------|-----|
| Macaque            | iitpsgevvvaslnirveegmhllitgpngcgksslfrilgglwptyyggvlykpppqrmf  | 540 |
| Marmoset           | iitpagevvvaslnirveegmhllitgpngcgksslfrilgglwptyyggvlykpppqrmf  | 540 |
| Mouse              | iitptgevvvaslnirveegmhllitgpngcgksslfrilgglwptyyggvlykpppqrmf  | 540 |
| Orangutan          | iitpsgevvvaslnirveegmhllitgpngcgksslfrilgglwptyyggvlykpppqrmf  | 540 |
| Panda              | iitptgevvvaslnirveegmhllitgpngcgksslfrilgglwptyyggvlykppprmf   | 540 |
| Pig                | iitpagevvvaslnirveegmhllitgpngcgksslfrilgglwptyyggvlykppperrmf | 540 |
| Pika               | ivtpagevvvaslsitveegmhllitgpngcgksslfrilgglwptyyggvlykpppqrmf  | 540 |
| Prairie-deer-mouse | iitptgevvvaslnirveegmhllitgpngcgksslfrilgglwptyyggvlykpppqrmf  | 540 |
| Rabbit             | iitptgevvvaslnirveegmhllitgpngcgksslfrilgglwptyyggvlykpppqrmf  | 540 |
| Rat                | iitptgevvvaslnirveegmhllitgpngcgksslfrilgglwptyyggvlykpppqrmf  | 540 |
| Rhesus-Monkey      | iitpsgevvvaslnirveegmhllitgpngcgksslfrilgglwptyyggvlykpppqrmf  | 540 |
| Seal               | iitptgevvvaslnirveegmhllitgpngcgksslfrilgglwptyyggvlykpppqrmf  | 540 |
| Squirrel-Monkey    | iitptgevvvaslnirveegmhllitgpngcgksslfrilgglwptyyggvlykpppqrmf  | 540 |
| Tarsier            | iitpagevvvaslnirveegmhllitgpngcgksslfrilgglwptyyggvlykpppqrmf  | 540 |
| Tasmanian-devil    | iitptgdivvanlnirveegmhllitgpngcgksslfrilgglwpayagvlykpppqrmf   | 419 |
| Walrus             | iitptgevvvaslnirveegmhllitgpngcgksslfrilgglwptyyggvlykpppqrmf  | 540 |
| Water-buffalo      | iitptgevvvaslnirveegmhllitgpngcgksslfrilgglwptyyggvlykpppqrmf  | 477 |
| White-Rhinoceros   | iitptgevvvaslnirveegmhllitgpngcgksslfrilgglwptyyggvlykplpqrmf  | 539 |
| Yak                | iitptgevvvaslnirveegmhllitgpngcgksslfrilgglwptyyggvlykpppqrmf  | 522 |
| Aardvark           | iitptgevvvaslnirveegmhllitgpngcgksslfrilgglwpayyggvlykpppqrmf  | 534 |
| Alpaca             | iitptgevvvaslnikveegmhllitgpngcgksslfrvlgglwptyyggvlykpppqrmf  | 538 |
| Armadillo          | iitpagevvvaslnirveegmhllitgpngcgksslfrilgglwpayyggvlykpppqrmf  | 540 |
| Baboon             | iitpsgevvvaslnirveegmhllitgpngcgksslfrilgglwptyyggvlykpppqrmf  | 540 |
| Bat                | iitptgevvvaslnirveegmhllitgpngcgksslfrilgglwptyyggvlykpppqrmf  | 540 |
| Cat                | iitptgevvvaslnirveegmhllitgpngcgksslfrilgglwpayyggvlykpppqrmf  | 540 |
| Chinchilla         | iitptgevvvaslnirveegmhllitgpngcgksslfrilgglwptyyggvlykpppqrmf  | 540 |
| Chinese-hamster    | iitptgevvvaslnirveegmhllitgpngcgksslfrilgglwptyyggvlykpppqrmf  | 540 |
| Cow                | iitptgevvvaslnirveegmhllitgpngcgksslfrilgglwptyyggvlykpppqrmf  | 540 |
| Dog                | iitptgevvvaslnirveegmhllitgpngcgksslfrilgglwptyyggvlykpppqrmf  | 540 |
| Dolphin            | ivtptgevvvaslnirveegmhllitgpngcgksslfrilgglwptyyggvlykpppqrmf  | 473 |
| Ferret             | iitptgevvvaslnirveegmhllitgpngcgksslfrilgglwptyyggvlykpppqrmf  | 540 |
| Florida-manatee    | iitptgevvvaslnirveegmhllitgpngcgksslfrilgglwpayyggvlykpppqrmf  | 539 |
| Flying-Fox         | iitptgevvvaslnirveegmhllitgpngcgksslfrilgglwptyyggvlykpppqrmf  | 540 |
| Golden-hamster     | iitptgevvvaslnirveegmhllitgpngcgksslfrilgglwptyyggvlykpppqrmf  | 538 |
| Ground-Squirrel    | iitptgevvvaslnirveegmhllitgpngcgksslfrilgglwptyyggvlykpppqrmf  | 538 |
| Guinea-pig         | iitptgevvvaslnirveegmhllitgpngcgksslfrilgglwptyyggvlykpppqrmf  | 540 |
| Hedgehog           | iitptgevvvaslnirveegmhllitgpngcgksslfrilgglwptyyggvlykpppqrmf  | 539 |
| Horse              | iitpagevvvaslnirveegmhllitgpngcgksslfrilgglwptyyggvlykpppqrmf  | 540 |
| Lemur              | vvtpagevvvaslnirveegmhllitgpngcgksslfrilgglwptyyggvlykpppqrmf  | 540 |
| Minke-whale        | ivtpagevvvaslnirveegthllitgpngcgksslfrilgglwptyyggvlykpppqrmf  | 520 |
| Mole-rat           | iitptgevvvaslnirveegmhllitgpngcgksslfrilgglwptyyggvlykpppqrmf  | 540 |
| Naked-mole-rat     | iitptgevvvaslnirveegmhllitgpngcgksslfrilgglwptyyggvlykpppqrmf  | 540 |
| Opposum            | iitptgdivvanlnirveegmhllitgpngcgksslfrilgglwpayagvlykpppqrmf   | 461 |
| Orca               | ivtptgevvvaslnirveegmhllitgpngcgksslfrilgglwptyyggvlykpppqrmf  | 540 |
| Prairie-vole       | iitptgevvvaslnirveegmhllitgpngcgksslfrilgglwptyyggvlykpppqrmf  | 540 |
| Python             | iitptgdivvtslnirvdegmhllitgpngcgksslfrilgglwptyygtlykppphrmf   | 481 |
| Small-eared-galago | iitptgevvvaslnmrveegmhllitgpngcgksslfrvlgglwptyyggvlykpppqrmf  | 540 |
| Sperm-whale        | vvtptgevvvaslnirveegmhllitgpngcgksslfrilgglwptyyggvlykpppqrmf  | 540 |

|                    |                                                                 |     |
|--------------------|-----------------------------------------------------------------|-----|
| Human              | yipqrpymsvgsldrdqviypdsvedmqrkgyseqdleaildvhlhhlqreggwteamcd    | 600 |
| Chimpanzee         | yipqrpymsvgsldrdqviypdsvedmqrkgyseqdleaildvhlhhlqreggwteamcd    | 600 |
| Elephant           | yipcrpymsvgsldrdqviypdsvedmqrkghseqhleaaildivnlqhlqreggwteamcd  | 600 |
| Gorilla            | yipqrpymsvgsldrdqviypdsvedmqrkgyseqdleaildvhlhhlqreggwteamcd    | 600 |
| Green-Monkey       | yipqrpymsvgsldrdqviypdsvedmrrkgyseqdleaildivhlhhlqreggwteamcd   | 596 |
| Jerboa             | yipqrpymsvgsldrdqviypdsvedmrrkgyseqdleaildivhlhhlqreggwteamcd   | 600 |
| Macaque            | yipqrpymsvgsldrdqviypdsvedmrrkgyseqdleaildivhlhhlqreggwteamcd   | 600 |
| Marmoset           | yipqrpymsvgsldrdqviypdsvedmrrkgyseqdleaildivhlhhlqreggwteamcd   | 600 |
| Mouse              | yipqrpymsvgsldrdqviypdsvedmrrkgyseqdleaildivhlhhlqreggwteamcd   | 600 |
| Orangutan          | yipqrpymsvgsldrdqviypdsvedmrrkgyseqdleaildvhlhhlqreggwteamcd    | 600 |
| Panda              | yipqrpymsvgsldrdqviypdsvedmrrkgyseqhleaildivhlhhlqreggwteamcd   | 600 |
| Pig                | yipqrpymvgsldrdqviypdsvedmrrkgyseqhleaildivhlhhlqreggwteamcd    | 600 |
| Pika               | yipqrpymsvgsldrdqviypdsvedmrrkgyseqhleaildivhlhhlqreggwteamcd   | 600 |
| Prairie-deer-mouse | yipqrpymsvgsldrdqviypdsvedmrrkgyseqhleaildvhlhhlqreggwteamcd    | 600 |
| Rabbit             | yipqrpymsvgsldrdqviypdsvedmrrkgyseqhleaildvhlhhlqreggwteamcd    | 600 |
| Rat                | yipqrpymsvgsldrdqviypdsvedmrrkgyseqhleaildivhlhhlqreggwteamcd   | 600 |
| Rhesus-Monkey      | yipqrpymsvgsldrdqviypdsvedmrrkgyseqdleaildivhlhhlqreggwteamcd   | 600 |
| Seal               | yipqrpymsvgsldrdqviypdsvedmrrkgyseqhleaildivhlhhlqreggwteamcd   | 600 |
| Squirrel-Monkey    | yipqrpymsvgsldrdqviypdsvedmrrkgyseqdleaildivhlhhlqreggwteamcd   | 600 |
| Tarsier            | yipqrpymsvgsldrdqviypdsvedmrrkgyseqhleaildivhlhhlqreggwteamcd   | 600 |
| Tasmanian-devil    | yipqrpymsvgsldrdqviypdtiedmrrkgyseqdhyleaildivnlhhlqreggwteamcd | 479 |
| Walrus             | yipqrpymsvgsldrdqviypdsvedmrrkgyseqhleaildivhlhhlqreggwteamcd   | 600 |
| Water-buffalo      | yipqrpymsvgsldrdqviypdsvedmrrkgyseqhleaildivhlhhlqreggwteamcd   | 537 |
| White-Rhinoceros   | yipqrpymsvgsldrdqviypdsvedmrrkgyseqhleaildivhlhhlqreggwteamcd   | 599 |
| Yak                | yipqrpymsvgsldrdqviypdsvedmrrkgyseqhleaildivhlhhlqreggwteamcd   | 582 |
| Aardvark           | yvpqrpymslgtlreqviypdsvedmrrkgsfdrdleaildivhlhhlqreggwteamcd    | 594 |
| Alpaca             | yipqrpymsvgsfrdqviypdsvedmrrkgyseqhleaildivhlhhlqreggwteamcd    | 598 |

|                    |                                                               |     |
|--------------------|---------------------------------------------------------------|-----|
| Armadillo          | yipqrpypmvgslrdqviypdtaedmrrkgyseqhleaailgivhlhhlqreggweavcd  | 600 |
| Baboon             | yipqrpymsvgslrdqviypdsvedmrrkgyseqdleaildivhlhhlqreggweamcd   | 600 |
| Bat                | yipqrpymsvgslrdqviypdsvedmrrkgyseqhleaaildivhlhhlqreggweavcd  | 600 |
| Cat                | yipqrpymsvgslrdqviypdsvedmrrkgyseqhleaaildivhlhhlqreggweavcd  | 600 |
| Chinchilla         | yipqrpymsvgslrdqviypdsvedmrrkgyseqqleaildivhlhhlqreggwealcd   | 600 |
| Chinese-hamster    | yipqrpymsvgslrdqviypdsaedmrrkgyseqqleailgivhlrhilqreggweavcd  | 600 |
| Cow                | yipqrpymsvgslrdqviypdsvedmrrkgyseehlegildivhlhhlqreggweavcd   | 600 |
| Dog                | yipqrpymsvgslrdqviypdsvedmrrkgyseqhleaaildivhlhhlqreggweavcd  | 600 |
| Dolphin            | yvpqrpymsvgslrdqviypdsvedmrrkgyfseqhleaaildivhlhhlqreggweavcd | 533 |
| Ferret             | yipqrpypmvgslrdqviypdsvedmrrkgyserhleaaildivhlhhlqreggweavcd  | 600 |
| Florida-manatee    | yipqrpymsvgslrdqviypdsvedmrrkgyseqhleaaildivhlhhlqreggweavcd  | 599 |
| Flying-Fox         | yipqrpymsvgslrdqviypdsvedmrrkgyseqhleaaildivhlhhlqreggweavcd  | 600 |
| Golden-hamster     | yipqrpymsvgslrdqviypdsaedmrrkgyseqqleailsivhlrhilqreggweavcd  | 598 |
| Ground-Squirrel    | yipqrpymsvgslrdqviypdsvedmrrkgyseqqleaildivhlhhlqreggweaicd   | 598 |
| Guinea-pig         | yipqrpymsvgslrdqviypdsvedmrrkgyseqqleaildivhlhhlqreggwealcd   | 600 |
| Hedgehog           | yipqrpymsvgslrdqviypdsvedmrrkgyseqhleaaildivhlhhlqreggweavcd  | 599 |
| Horse              | yipqrpymsvgslrdqviypdsvedmrrkgyseqhleaaildivhlhhlqreggweatcd  | 600 |
| Lemur              | yipqrpypmvgslrdqviypdsvadmrrkgysehhleaaildivhlhhlqreggweavcd  | 600 |
| Minke-whale        | yvsrrpymsvgslrdqviypdsvedmrrkgyfseqhleaaildivhlhhlqreggweavcd | 580 |
| Mole-rat           | yipqrpymsvgslrdqviypdsvedmrrkgyseqqleaildivhlhhlqreggweavcd   | 600 |
| Naked-mole-rat     | yipqrpymsvgslrdqviypdsvedmrrkgyseqqletildivhlhhlqreggwealcd   | 600 |
| Opposum            | yipqrpymsvgslrdqviypdtvedmrrkgydsyleaildivnlhivqreggweascd    | 521 |
| Orca               | yvpqrpymsvgslrdqviypdsvedmrrkgyfseqhleaaildivhlhhlqreggweavcd | 600 |
| Prairie-vole       | yipqrpymsvgslrdqviypdsaedmrrkgyseqqleaildivhlrhilqreggweavcd  | 600 |
| Python             | yipqrpymsvgtlrdqviypdtfdkdmrrkghtdsdlerildivnlnyivqreggweavsd | 541 |
| Small-eared-galago | yipqrpymsvgslrdqviypdsvedmrrkgyserhleaaildivhlhhlqreggweamcd  | 600 |
| Sperm-whale        | yvpqrpymsvgslrdqviypdsvedmrrkgyfseqhleaaildivhlhhlqreggweavcd | 600 |

|                    |                                                               |     |
|--------------------|---------------------------------------------------------------|-----|
| Human              | wkdvlsggekqrigmarmfyhrpkyalldectsavsidsvegkifqaakdagiallsithr | 660 |
| Chimpanzee         | wkdvlsggekqrigmarmfyhrpkyalldectsavsidsvegkifqaakdagiallsithr | 660 |
| Elephant           | wkdvlsggekqrigmarmfyhrpkyalldectsavsidsvegkifqaakdagiallsithr | 660 |
| Gorilla            | wkdvlpggekqrigmarmfyhrpkyalldectsavsidsvegkifqaakdagiallsithr | 660 |
| Green-Monkey       | wkdvlsggekqrigmarmfyhrpkyalldectsavsidsvegkifqaakdagiallsithr | 656 |
| Jerboa             | wkdvlsggekqrigmarmfyhrpkyalldectsavsidsvegkifqaakdagiallsithr | 660 |
| Macaque            | wkdvlsggekqrigmarmfyhrpkyalldectsavsidsvegkifqaakdagiallsithr | 660 |
| Marmoset           | wkdvlsggekqrigmarmfyhrpkyalldectsavsidsvegkifqaakdtgiallsithr | 660 |
| Mouse              | wkdvlsggekqrigmarmfyhrpkyalldectsavsidsvegkifqaakdagiallsithr | 660 |
| Orangutan          | wkdvlsggekqrigmarmfyhrpkyalldectsavsidsvegkifqaakdagiallsithr | 660 |
| Panda              | wkdvlsggekqrigmarmfyhrpkyalldectsavsidsvegkifqaakdagiallsithr | 660 |
| Pig                | wkdvlsggekqrvgmarmfyhrpkyalldectsavsidsvegkifqaakdagiallsithr | 660 |
| Pika               | wkdvlsggekqrigmarmfyhrpkyalldectsavsidsvegkifqaakdagiallsithr | 660 |
| Prairie-deer-mouse | wkdvlsggekqrigmarmfyhrpkyalldectsavsidsvegkifqaakdagiallsithr | 660 |
| Rabbit             | wkdvlsggekqrigmarmfyhrpkyalldectsavsidsvegkifqaakdagiallsithr | 660 |
| Rat                | wkdvlsggekqrigmarmfyhrpkyalldectsavsidsvegkifqaakdagisllsithr | 660 |
| Rhesus-Monkey      | wkdvlsggekqrigmarmfyhrpkyalldectsavsidsvegkifqaakdagiallsithr | 660 |
| Seal               | wkdvlsggekqrigmarmfyhrpkyalldectsavsidsvegkifqaakdagiallsithr | 660 |
| Squirrel-Monkey    | wkdvlsggekqrigmarmfyhrpkyalldectsavsidsvegkifqaakdagiallsithr | 660 |
| Tarsier            | wkdvlsggekqrigmarmfyhrpkyalldectsavsidsvegkifqaakdagiallsithr | 660 |
| Tasmanian-devil    | wkdvlsggekqrigmarmfyhrpkyalldectsavsidsvegkifqaakdagiallsithr | 539 |
| Walrus             | wkdvlsggekqrigmarmfyhrpkyalldectsavsidsvegkifqaakdagiallsithr | 660 |
| Water-buffalo      | wkdvlsggekqrvgmarmfyhrpkyalldectsavsidsvegkifqaakdagiallsithr | 597 |
| White-Rhinoceros   | wkdvlsggekqrigmarmfyhrpkyalldectsavsidsvegkifqaakdagiallsithr | 659 |
| Yak                | wkdvlsggekqrvgmarmfyhrpkyalldectsavsidsvegkifqaakdagiallsithr | 642 |
| Aardvark           | wkdvlsggekqrvamarmfyhrpkyalldectsavsidsvegrifqaakdagiallsithr | 654 |
| Alpaca             | wkdvlsggekqrvgmarmfyhrpkyalldectsavsidsvegkifqaakdagiallsithr | 658 |
| Armadillo          | wkdvlsggekqrigmarmfyhrpkyalldectsavsidsvegkifqaakdagiallsithr | 660 |
| Baboon             | wkdvlsggekqrigmarmfyhrpkyalldectsavsidsvegkifqaakdagiallsithr | 660 |
| Bat                | wkdvlsggekqrigmarmfyhkpyalldectsavsidsvegkifqaakdagiallsithr  | 660 |
| Cat                | wkdvlsggekqrigmarmfyhrpkyalldectsavsidsvegkifqaakdagiallsithr | 660 |
| Chinchilla         | wkdvlsggekqrigmarmfyhrpkyalldectsavsidsvegkifqaakdagiallsithr | 660 |
| Chinese-hamster    | wkdvlsggekqrigmarmfyhrpkyalldectsavsidsvegkifqaakdagiallsithr | 660 |
| Cow                | wkdvlsggekqrvgmarmfyhrpkyalldectsavsidsvegkifqaakdagiallsithr | 660 |
| Dog                | wkdvlsggekqrigmarmfyhrpkyalldectsavsidsvegkifqaakdagiallsithr | 660 |
| Dolphin            | wkdvlsggekqrvgmarmfyhrpkyalldectsavsidsvegkifqaakdagiallsithr | 593 |
| Ferret             | wkdvlsggekqrigmarmfyhrpkyalldectsavsidsvegkifqaakdagiallsithr | 660 |
| Florida-manatee    | wkdvlsggekqriamarmfyhrpkyalldectsavsidsvegkifqaakdagiallsithr | 659 |
| Flying-Fox         | wkdvlsggekqrigmarmfyhkpyalldectsavsidsvegkifqaakdagiallsithr  | 660 |
| Golden-hamster     | wkdvlsggekqrigmarmfyhrpkyalldectsavsidsvegkifqaakdagiallsithr | 658 |
| Ground-Squirrel    | wkdvlsggekqrigmarmfyhrpkyalldectsavsidsvegkifqaakdagiallsithr | 658 |
| Guinea-pig         | wkdvlsggekqrigmarmfyhrpkyalldectsavsidsvegkifqaakdagiallsithr | 660 |
| Hedgehog           | wkdvlsggekqrigmarmfyhkpyalldectsavsidsvegkifqaakdagiallsithr  | 659 |
| Horse              | wkdvlsggekqrigmarmfyhrpkyalldectsavsidsvegkifqaakdagiallsithr | 660 |
| Lemur              | wkdvlsggekqrigmarmfyhrpkyalldectsavsidsvegkifqaakdagiallsithr | 660 |
| Minke-whale        | wkdilsggekqrvgmarmfyhrpkyalldectsavsidsvegkifqaakdagiallsithr | 640 |
| Mole-rat           | wkdvlsggekqrigmarmfyhrpkyalldectsavsidsvegkifqaakdagiallsithr | 660 |
| Naked-mole-rat     | wkdvlsggekqrigmarmfyhrpkyalldectsavsidsvegkifqaakdagiallsithr | 660 |



|                    |                                                               |     |
|--------------------|---------------------------------------------------------------|-----|
| Opposum            | wkdvlsggekqrigmarmfyhrpkyalldectsavsidsvegkifqaakdagiallsithr | 581 |
| Orca               | wkdvlsggekqrvgmarmfyhrpkyalldectsavsidsvegkifqaakdagiallsithr | 660 |
| Prairie-vole       | wkdvlsggekqrigmarmfyhrpkyalldectsavsidsvegkifqaakdagiallsithr | 660 |
| Python             | wkdvlsggekqrmgmarmfyhrpkyalldectsavsidsvegkifqaakdagiallsithr | 601 |
| Small-eared-galago | wkdvlsggekqrigmarmfyhrpkyalldectsavsidsvegkifqaakdagiallsithr | 660 |
| Sperm-whale        | wkdvlsggekqrvgmarmfyhrpkyalldectsavsidsvegkifqaakdagiallsithr | 660 |

|                    |                                                              |     |
|--------------------|--------------------------------------------------------------|-----|
| Human              | pslwkyhthllqfdgeggwgfekldsaarlslteekqrleqqlagipkmqrrlqelcqil | 720 |
| Chimpanzee         | pslwkyhthllqfdgeggwgfekldsaarlslteekqrleqqlagipkmqrrlqelcqil | 720 |
| Elephant           | pslwkyhthllqfdgeggwgfekldsaarlslteekqrleqqlagipkmqrrlqelchil | 720 |
| Gorilla            | pslwkyhthllqfdgeggwgfekldsaarlslteekqrleqqlagipkmqrrlqelcqil | 720 |
| Green-Monkey       | pslwkyhthllqfdgeggwgfekldsaarlslteekqrleqqlagipkmqrrlqelcqil | 716 |
| Jerboa             | pslwkyhthllqfdgeggwgfekldsaarlslteekqrleqqlagmpemqgrlqelrqil | 720 |
| Macaque            | pslwkyhthllqfdgeggwgfekldsaarlslteekqrleqqlagipkmqrrlqelcqil | 720 |
| Marmoset           | pslwkyhthllqfdgeggwgfekldsaarlslteekqrleqqlagipkmqrrlqelcqil | 720 |
| Mouse              | pslwkyhthllqfdgeggwgfekldsaarlslteekqrleqqlagipkmqrrlqelrqil | 720 |
| Orangutan          | pslwkyhthllqfdgeggwgfekldpaarlslteekqrleqqlagipkmqrrlqelcqil | 720 |
| Panda              | pslwkyhthllqfdgeggwgfekldsaarlslteekqrleqqlagipkmqrrlqelcqil | 720 |
| Pig                | pslwkyhthllqfdgeggwgfekldsaarlslteekqrleqqlagipkmqrrlqelcqil | 720 |
| Pika               | pslwkyhthllqfdgeggwgfekldsaarlslteekqrleqqlagipkmqrrlqelcqil | 720 |
| Prairie-deer-mouse | pslwkyhthllqfdgeggwgfekldsaarlslteekqrleqqlagipkmqrrlqelrqil | 720 |
| Rabbit             | pslwkyhthllqfdgeggwgfekldsaarlslteekqrleqqlagipkmqrrlqelcqil | 720 |
| Rat                | pslwkyhthllqfdgeggwgfekldsaarlslteekqrleqqlagipkmqrrlqelrqil | 720 |
| Rhesus-Monkey      | pslwkyhthllqfdgeggwgfekldsaarlslteekqrleqqlagipkmqrrlqelcqil | 720 |
| Seal               | pslwkyhthllqfdgeggwgfekldpaarlslteekqrleqqlagipkmqrrlqelcqil | 720 |
| Squirrel-Monkey    | pslwkyhthllqfdgeggwgfekldsaarlslteekqrleqqlagipkmqrrlqelcqil | 720 |
| Tarsier            | pslwkyhthllqfdgeggwgfekldsaarlslteekqrleqqlagipkmqrrlqelcqil | 720 |
| Tasmanian-devil    | pslwkyhthllqfdgeggwgfekldtvttrlreekqrleqqlagipkmqrrlqelceil  | 599 |
| Walrus             | pslwkyhthllqfdgeggwgfekldpaarlslteekqrleqqlagipkmqrrlqelchil | 720 |
| Water-buffalo      | pslwkyhthllqfdgeggwgfekldsaarlslteekqrleqqlagipkmqrrlqelcqil | 657 |
| White-Rhinoceros   | pslwkyhthllqfdgeggwgfekldsaarlslteekqrleqqlagvpmqrrlqelcqil  | 719 |
| Yak                | pslwkyhthllqfdgeggwgfekldsaarlslteekqrleqqlagipkmqrrlqelcqil | 702 |
| Aardvark           | pslwkyhthllqfdgeggwgfekldsaarlslteekqrleqqlagipkmqrrlqelcqil | 714 |
| Alpaca             | pslwkyhthllqfdgeggwgfekldsaarlslteekqrleqqlagipkmqrrlqelcqil | 718 |
| Armadillo          | pslwkyhthllqfdgeggwgfekldsaarlslteekqrleqqlagipkmqrrlqelcqil | 720 |
| Baboon             | pslwkyhthllqfdgeggwgfekldsaarlslteekqrleqqlagipkmqrrlqelcqil | 720 |
| Bat                | pslwkyhthllqfdgeggwgfekldsaarlslteekqrleqqlagipkmqrrlqelcqil | 720 |
| Cat                | pslwkyhthllqfdgeggwgfekldsaarlslteekqrleqqlagipkmqrrlqelcqil | 720 |
| Chinchilla         | pslwkyhthllqfdgeggwgfekldsaarlslreerqrleqqlagipkmqrrlqelchil | 720 |
| Chinese-hamster    | pslwkyhthllqfdgeggwgfekldsaarlslteekqrleqqlagipkmqrrlqelcqil | 720 |
| Cow                | pslwkyhthllqfdgeggwgfekldsaarlslteekqrleqqlagipkmqrrlqelcqil | 720 |
| Dog                | pslwkyhthllqfdgeggwgfekldsaarlslteekqrleqqlagipkmqrrlqelcqil | 720 |
| Dolphin            | pslwkyhthllqfdgeggwgfekldsaarlslteekqrleqqlagipkmqrrlqelceil | 653 |
| Ferret             | pslwkyhthllqfdgeggwgfekldsaarlslteekqrleqqlagvpmqrrlqelcqil  | 720 |
| Florida-manatee    | pslwkyhthllqfdgeggwgfekldsaarlslteekqrleqqlagipkmqrrlqelchil | 719 |
| Flying-Fox         | pslwkyhthllqfdgeggwgfekldsaarlslteekqrleqqlagipkmqrrlqelcqil | 720 |
| Golden-hamster     | pslwkyhthllqfdgeggwgfekldsaarlslteekqrleqqlagipkmqrrlqelcqil | 718 |
| Ground-Squirrel    | pslwkyhthllqfdgeggwgfekldsaarlslteekqrleqqlagipkmqrrlqelrqil | 718 |
| Guinea-pig         | pslwkyhthllqfdgeggwgfekldsaarlslteerqrleqqlagvpmqrrleelrhil  | 720 |
| Hedgehog           | pslwkyhthllqfdgeggwgfekldsaarlslteekqrleqqlagipkmqrrlqelcqil | 719 |
| Horse              | pslwkyhthllqfdgeggwgfekldsaarlslteekqrleqqlagipkmqrrlqelcqil | 720 |
| Lemur              | pslwkyhthllqfdgeggwgfekldsaarlslteekqrleqqlagipkmqrrlqelrqil | 720 |
| Minke-whale        | pslwkyhthllqfdgeggwgfekldsaarlslteekqrleqqlagipkmqrrlqelcqil | 700 |
| Mole-rat           | pslwkyhthllqfdgeggwgfekldsaarlslteekqrleqqlagipkmqrrlqelrqil | 720 |
| Naked-mole-rat     | pslwkyhthllqfdgeggwgfekldsaarlslteerqrleqqlagvpmqrrlqelrhil  | 720 |
| Opposum            | pslwkyhthllqfdgeggwgfekldsaarlslreerqrleqqlagipkmqrrlqelceil | 641 |
| Orca               | pslwkyhthllqfdgeggwgfekldsaarlslteekqrleqqlagipkmqrrlqelceil | 720 |
| Prairie-vole       | pslwkyhthllqfdgeggwgfekldsaarlslteekqrleqqlagipkmqrrlqelrqil | 720 |
| Python             | pslwkyhthllqfdgeggwgfekldpaarlslreerqrleqqlagvpmqrrlqelceil  | 661 |
| Small-eared-galago | pslwkyhthllqfdgeggwgfekldsaarlslteekqrleqqlagipkiqrrlqelrqil | 720 |
| Sperm-whale        | pslwkyhthllqfdgeggwgfekldsaarlslteekqrleqqlagipkmqrrlqelcqil | 720 |

|              |                             |     |
|--------------|-----------------------------|-----|
| Human        | geavapahvpapsppqpgg-lqgast  | 745 |
| Chimpanzee   | geavapahvpapsppqpgg-lqgast  | 745 |
| Elephant     | geaaap-----                 | 726 |
| Gorilla      | geavapahvpapsppqpgg-lqgast  | 745 |
| Green-Monkey | geamapaqvpapsppqpgg-lqgast  | 741 |
| Jerboa       | geaaapggppeaslpqpggips----- | 741 |
| Macaque      | geamapaqvpapsppqpgg-lqgast  | 745 |
| Marmoset     | geavapaqapaqsp-----         | 734 |
| Mouse        | geaaapvqplvpqgvt-----       | 736 |
| Orangutan    | geavapahvpapsppqpgg-lqgast  | 745 |
| Panda        | ggsgvlggaapp-----           | 733 |
| Pig          | ggpgvphgaat-----            | 732 |
| Pika         | geaaspqqltapslpqpst-----    | 741 |

|                    |                            |     |
|--------------------|----------------------------|-----|
| Prairie-deer-mouse | gevaapvqplvpgvst-----      | 736 |
| Rabbit             | geavtpgqlaapslpggvpt-----  | 741 |
| Rat                | geaaapvqplvpgipt-----      | 736 |
| Rhesus-Monkey      | geamapaqvpapspqdpqg-lqgast | 745 |
| Seal               | ggsgvlgga-----             | 731 |
| Squirrel-Monkey    | geavapaeapapsqpgpg-lqgast  | 745 |
| Tarsier            | geavapqspapglqgpsvapgast-  | 745 |
| Tasmanian-devil    | gedadlhhvsqtsrpsp-----     | 616 |
| Walrus             | ggsgvlggaapp-----          | 733 |
| Water-buffalo      | ggpgganqgaat-----          | 669 |
| White-Rhinoceros   | ggglqgatt-----             | 728 |
| Yak                | ggpgganqgtat-----          | 714 |
| Aardvark           | gesavpggp-----             | 723 |
| Alpaca             | ggpsglqgaat-----           | 730 |
| Armadillo          | geaaapqqplapevat-----      | 736 |
| Baboon             | geamapaqvpapspqdpqg-lqgast | 745 |
| Bat                | ggrrrvvqgaat-----          | 732 |
| Cat                | ggsgvlggaasp-----          | 733 |
| Chinchilla         | getpgpavpp-----            | 730 |
| Chinese-hamster    | getaapvqplvpgvpt-----      | 736 |
| Cow                | ggpgganqgtat-----          | 732 |
| Dog                | ggsgvlggavpp-----          | 733 |
| Dolphin            | ggpgvlgaaat-----           | 665 |
| Ferret             | ggpgvlggapl-----           | 733 |
| Florida-manatee    | geaaapeqppapspppglsrgatt-  | 744 |
| Flying-Fox         | ggpkvlggadi-----           | 732 |
| Golden-hamster     | getaapvkplvpdvpt-----      | 734 |
| Ground-Squirrel    | geamapqppaaslpggvpt-----   | 739 |
| Guinea-pig         | geatgpgips-----            | 730 |
| Hedgehog           | geatsgspassppgglpgitt-     | 744 |
| Horse              | ggglqgatt-----             | 729 |
| Lemur              | geavapggpsvl-qgtat-----    | 738 |
| Minke-whale        | ggpgvlgaaat-----           | 712 |
| Mole-rat           | geaaap-qpmaaslpggvpt-----  | 740 |
| Naked-mole-rat     | geap-----                  | 724 |
| Opposum            | aedadsrpvpqtsdp-----       | 656 |
| Orca               | ggpgvlgaaat-----           | 732 |
| Prairie-vole       | geaaapvqplvpgvpt-----      | 736 |
| Python             | gedapsamg-----             | 670 |
| Small-eared-galago | geavapggppvlrpqpgsglqgass  | 746 |
| Sperm-whale        | ggpgvlgaaat-----           | 732 |
